# Supplementary material
Source: MDPI journal article supplement (https://www.mdpi.com/2311-553X/9/3/33)
Supplement: s1 [file s1]

**Supplementary Table S2: Translationally repressed genes putatively targeted by miR-AS1**

| Gene Symbol | miR-AS1 pairing MFE (Kcal/mol) | Delta Tranlational Enhancement |
|-------------|--------------------------------|--------------------------------|
| AADAC       | -27.00                         | -1.57                          |
| ABCA12      | -24.30                         | -2.05                          |
| APOL3       | -33.60                         | -1.52                          |
| ARX         | -22.40                         | -1.11                          |
| BTN3A3      | -22.00                         | -1.45                          |
| C17orf67    | -22.00                         | -2.13                          |
| C9orf84     | -22.30                         | -1.83                          |
| CD34        | -24.90                         | -2.43                          |
| CHI3L2      | -24.90                         | -2.15                          |
| CPA4        | -25.90                         | -1.50                          |
| CXCL6       | -24.10                         | -1.76                          |
| CXCL9       | -25.10                         | -3.33                          |
| CYP1A1      | -24.70                         | -1.80                          |
| DIDO1       | -30.80                         | -0.23                          |
| DNER        | -27.70                         | -1.90                          |
| FAM115C     | -30.20                         | -1.14                          |
| FOS         | -23.40                         | -2.83                          |
| FOSB        | -25.90                         | -1.05                          |
| HIST1H3H    | -22.70                         | -2.57                          |
| LHFPL1      | -24.90                         | -2.26                          |
| LRRN2       | -23.20                         | -2.66                          |
| MAP6        | -30.90                         | -1.26                          |
| MX2         | -25.30                         | -2.06                          |
| NEXN        | -29.40                         | -1.76                          |
| NR4A3       | -25.70                         | -1.45                          |
| PRMT8       | -27.70                         | -1.27                          |
| RBMX2       | -29.60                         | 2.26                           |
| RORB        | -34.20                         | -1.14                          |
| RPRM        | -25.40                         | -2.88                          |
| RSPH10B2    | -22.20                         | -1.45                          |
| RTN4RL1     | -25.30                         | -2.04                          |
| RUFY4       | -26.20                         | -1.41                          |
| RYR3        | -23.30                         | -1.82                          |
| SCN4B       | -27.90                         | -1.65                          |
| SELL        | -22.80                         | -4.53                          |
| SLC28A3     | -26.10                         | -2.77                          |
| STAC        | -25.50                         | -1.21                          |
| TMEM213     | -30.60                         | -1.85                          |
| TMX2        | -24.30                         | -1.02                          |
| UBQLNL      | -28.00                         | -2.07                          |

MFE: as computed by RNAhybrid; Translational Enhancement as computed by Puray-Chavez et al.
