# Supplementary material
Source: MDPI journal article supplement (https://www.mdpi.com/2311-553X/9/3/33)
Supplement: s1 [file s1]

**Supplementary Table S1. Oligonucleotides used for qPCR and RNAi**

| <b>small RNA RT-qPCR</b> |                                     |
|--------------------------|-------------------------------------|
| Neg_ctrl_RT              | CTAGCCTTGAGTCGAGCAGGTCTAGACTACTTACT |
| Neg_ctrl_FWD             | AA+TGTATA+CATTGTC+AG                |
| Neg_ctrl_REV             | GTCGAGCAGGTCTAGACTACTTACT           |
| miR-AS1_RT               | CTGGTGTCTGGAGTCGGCAATGGTGCCAC       |
| miR-AS1_FWD              | G+AA+GAG+CAGCAGAAG                  |
| miR-AS1_REV              | CTGGTGTCTGGAGTCGGCAA                |
| let7a-RT                 | TGATCGGTAGTAGGACCATCAACTATAC        |
| let7a-FWD                | T+GA+GGTAGTAGGTTG                   |
| let7a-REV                | TGATCGGTAGTAGGACCATC                |
| <b>mRNA RT-qPCR</b>      |                                     |
| RdRp_FWD                 | GTGAAATGGTCATGTGTGGCGG              |
| RdRp_REV                 | CAGATGTTAAACACACTATTAGCATA          |
| GAPDH_FWD                | GAAATCCCATCACCATCTTCCAG             |
| GAPDH_REV                | GAGCCCCAGCCTTCTCCATG                |
| <b>siRNAs</b>            |                                     |
| Ambion                   | Silencer Negative control #AM4611   |
| SARS_CoV-2-miR-1         | GAAGAGCAGCAGAAGUGGCACCA             |
| SARS_CoV-2-miR-1_as      | GUGCCACUUCUGCUGCUCUUCUU             |

Bases prepended by a "+" are LNA modified
