# Supplementary material
Source: MDPI journal article supplement (https://www.mdpi.com/2311-553X/9/3/33)
Supplement: s1 [file s1]

Archive with 3 entries (3 files):
- supplementary-figures.pdf
- supplementary-table S1.pdf
- supplementary-table S2.pdf
